# Supplementary material for: Metabolomics Analysis Reveals the Effect of Two Alpine Foliar Diseases on the Non-Volatile and Volatile Metabolites of Tea
Source: MDPI journal article supplement (doi:10.3390/foods12081568), 2023-04-07
Supplement: s1 [file s1]

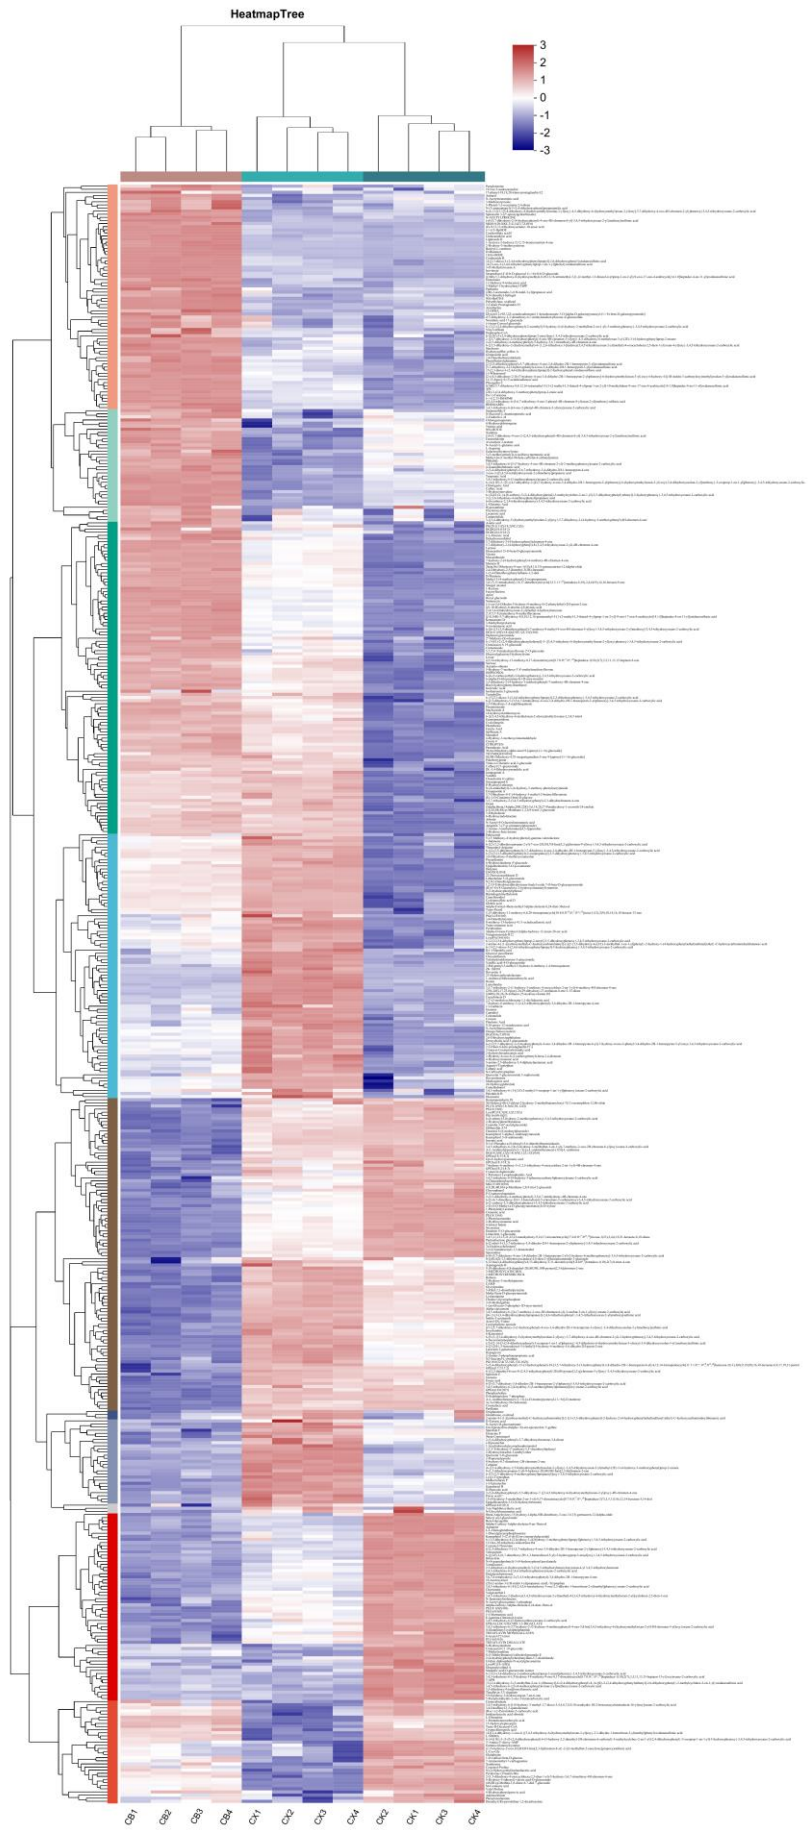

Figure S1. A heatmap showing the relative variation of differential metabolites in HT, SS and BB. HT: Healthy tea shoots, SS: Tea shoots infected with small leaf spot disease, BB: Tea shoots infected with blister blight disease.

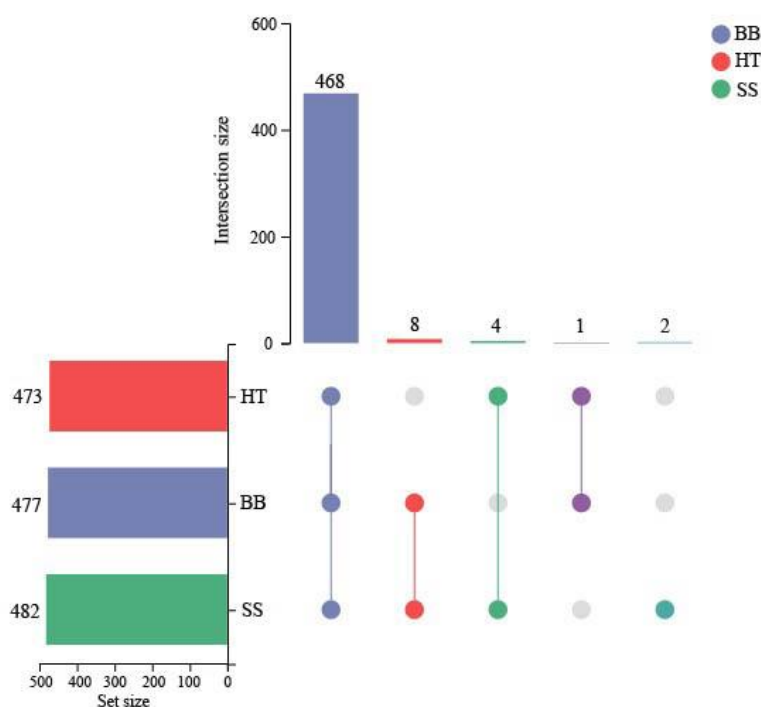

Figure S2. Overlapping relationship of differential metabolites among different samples shown in Venn diagrams in negative (-) ion mode. HT: Healthy tea shoots, SS: Tea shoots infected with small leaf spot disease, BB: Tea shoots infected with blister blight disease.
